# Supplementary material
Source: PubMed Central journal article supplement (PMC10300651)
Supplement: NIHMS1869824-supplement-Supplementary_Figures_and_Legends.pdf [file NIHMS1869824-supplement-Supplementary_Figures_and_Legends.pdf]

## **SUPPLEMENTAL INFORMATION**

### **Nuclear mRNA metabolism drives selective basket assembly on a subset of nuclear pore complexes in budding yeast**

Pierre Bensidoun, Taylor Reiter, Ben Montpetit, Daniel Zenklusen and Marlene Oeffinger

#### **Inventory of Supplemental Information**

**Supplemental Figure S1.** Single-protein tracking data for Mlp1-Halo and Halo-NLS, Related to Figure 1.

**Supplemental Figure S2.** Mlp1 granule formation in *rpb1-1* cells at non-permissive temperature, Related to Figure 2.

**Supplemental Figure S3.** Distribution of Mlp1-GFP under different conditions of nucleolar fragmentation, Related to Figure 3

**Supplemental Figure S4.** Expression and distribution of Mlp1-GFP upon depletion of select nuclear mRNA metabolism factors, Related to Figure 4

**Supplemental Figure S5.** Localization of Mlp1, NPC and mRNP components by Structured illumination microscopy, Related to Figure 5

**Supplemental Figure S6.** Method and data analysis for complexes co-isolated by differential affinity purification with basket-containing and basket-less NPCs, Related to Figure 6

**Supplemental Figure S7.** Analysis of transcript features of co-isolated RNAs across affinity-purified basket-containing and basket-less NPC samples, Related to Figure 7

**Supplemental Table S2.** Plasmids used in this study, Related to STAR Methods

**Supplemental Table S3.** Primer for construct generation, Related to STAR Methods

A

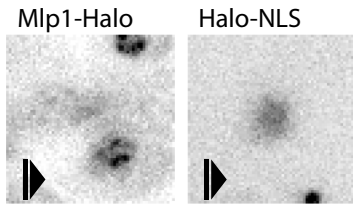

B

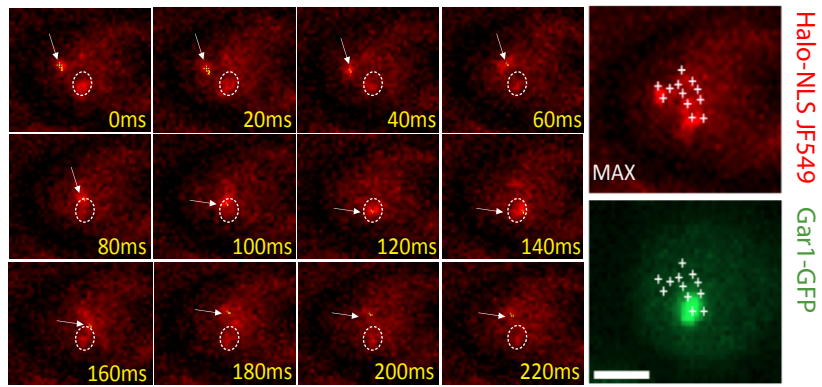

C

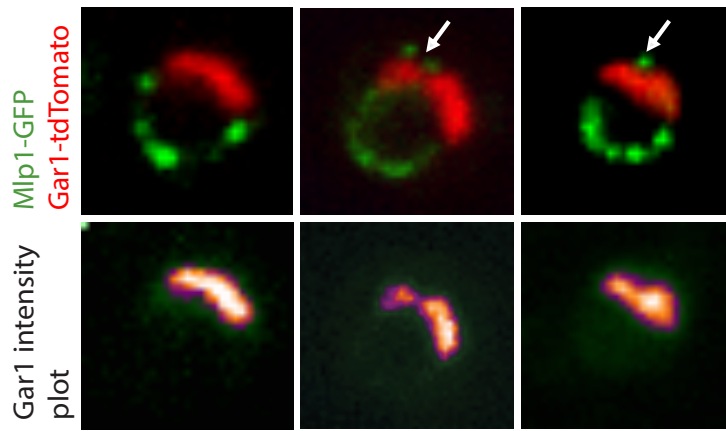

**Supplemental Figure S1. Single-protein tracking data for Mlp1-Halo and Halo-NLS, Related to Figure 1.**

**A.** Movies of Mlp1-Halo and Halo-NLS diffusion acquired at 20-ms intervals. For Mlp1, early timepoints of the movie show proteins with steady state localization at the nuclear periphery that bleach progressively during image acquisition. **B.** Individual still frames from movie tracking Halo-NLS JF549 (red). White arrows show Halo-NLS JF549 in each frame; dashed circle presents nucleolar area also represented by Gar1-GFP in green. MAX = the maximum intensity projection of all frames with the path highlighted with white crosses. Scale bar=2 $\mu$ m. **C.** Fluorescent microscopy of Mlp1-GFP and Gar1-tdTomato distribution; arrows denoting ectopic baskets. Scan intensity plots measuring Gar1-tdTomato signal as nucleolar marker (lower panels).

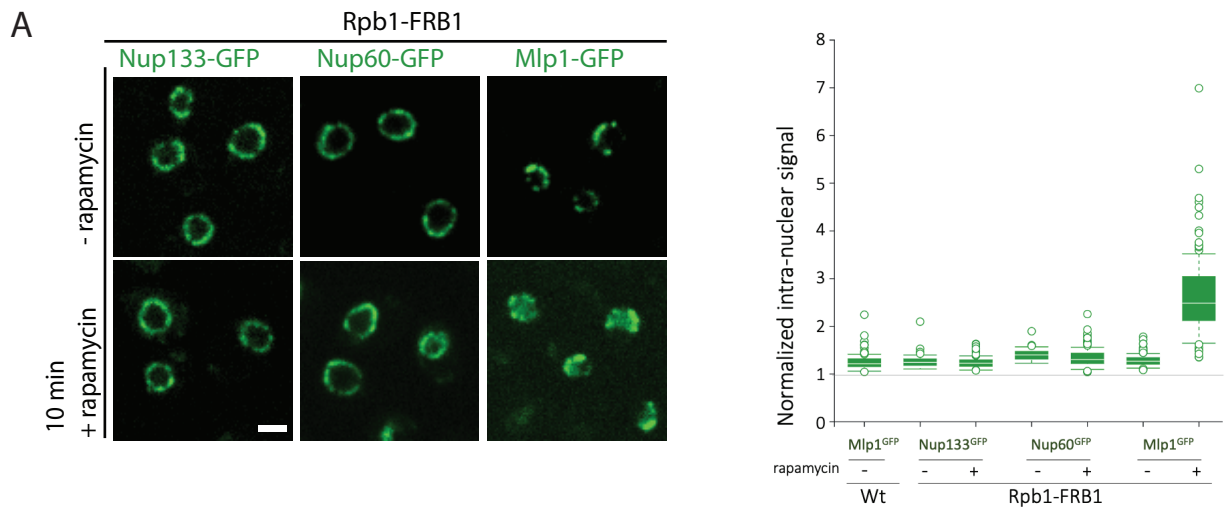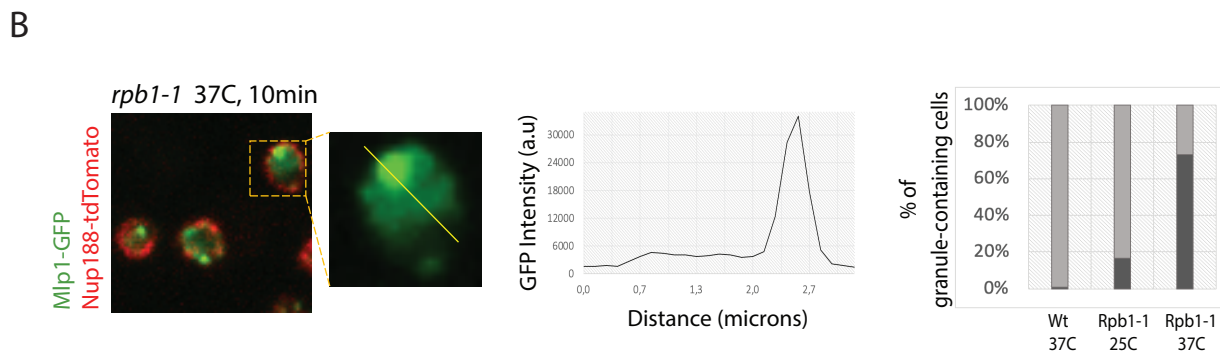

Bensidoun et al. Figure S2

**Supplemental Figure S2. Mlp1 granule formation in *rpb1-1* cells at non-permissive temperature, Related to Figure 2.**

**A.** Fluorescent microscopy of Nup133-GFP, Nup60-GFP and Mlp1-GFP localization in Rpb1-FRB1 Anchor-Away cells pre- and post-addition of rapamycin (1 $\mu$ g/mL 500  $\mu$ M, 40 mins) (Jeronimo and Robert, 2014). Bar graph shows quantification of average Mlp1-GFP intranuclear signal intensities in the center of cell nuclei normalized over background signals in all conditions (n=100; Data are represented as mean  $\pm$  SEM). **B.** Mlp1-GFP granule formation in *rpb1-1* cells at 37°C; line scan intensity plot shows Mlp1-GFP distribution. Nup188-tdTomato signal is shown in red. Histogram quantification of % cells with Mlp1-GFP granules in Wt and *rpb1-1* cells at 25°C and 37°C.

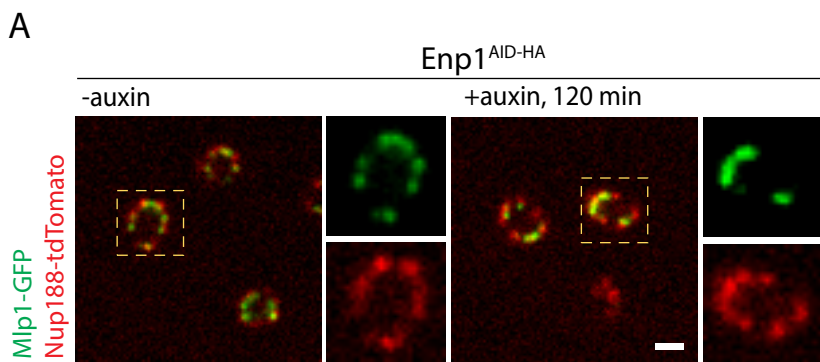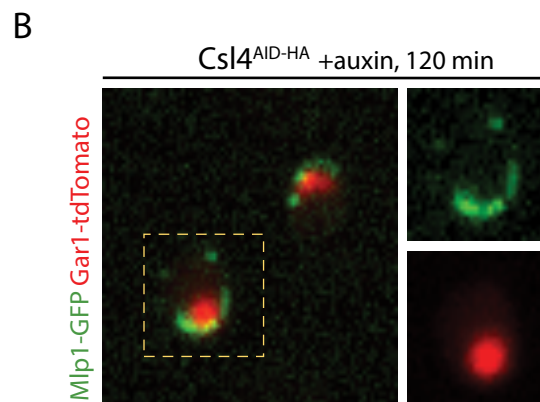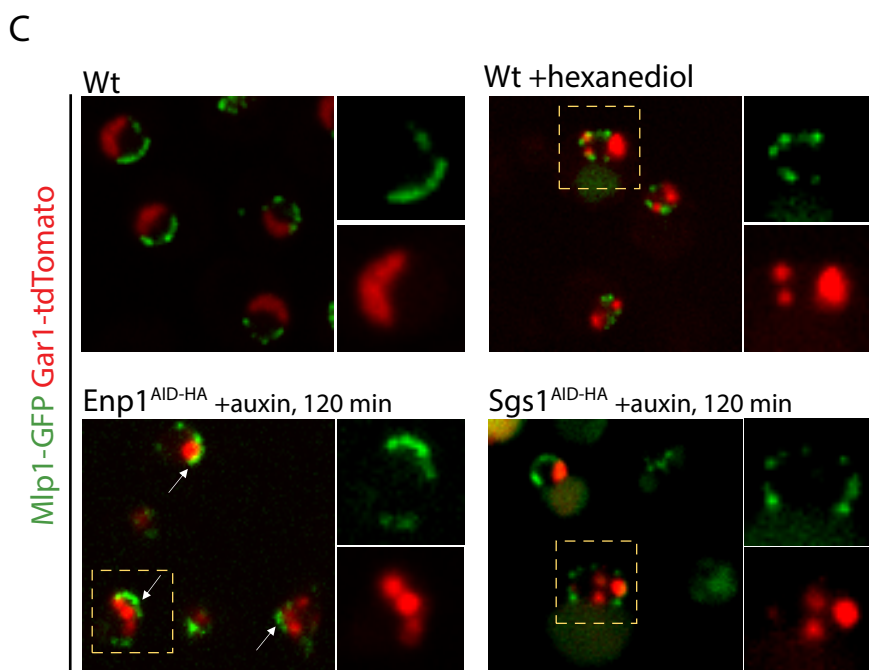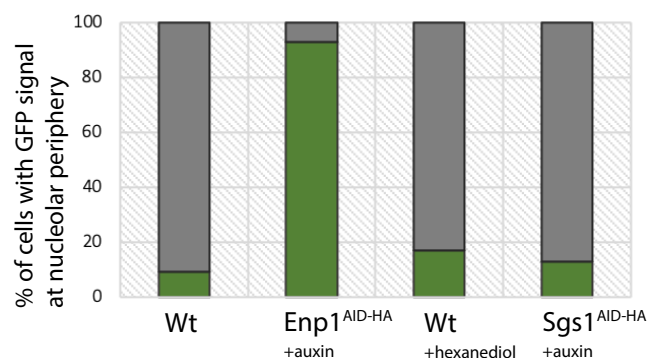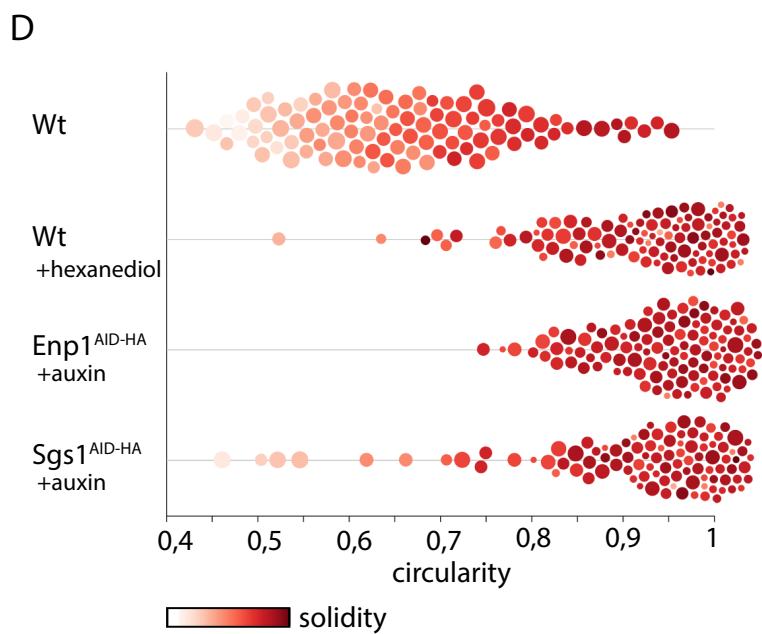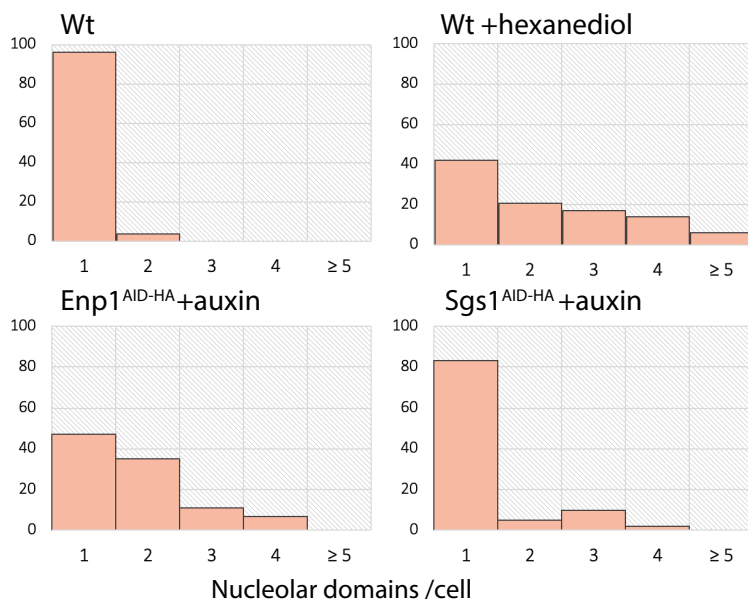

**Supplemental Figure S3. Distribution of Mlp1-GFP under different conditions of nucleolar fragmentation, Related to Figure 3.**

**A.** Distribution of Mlp1-GFP along the nuclear and nucleolar peripheries in  $Enp1^{AID-HA}$  cells pre- and post-auxin treatment. Nuclear periphery labeled by Nup188-tdTomato. **B** Distribution of Mlp1-GFP along the nucleolar periphery in  $Csl4^{AID-HA}$  cells post-auxin treatment. Nucleolus labeled by Gar1-tdTomato. Scale bar =2 $\mu$ m. **C.**  $Enp1^{AID-HA}$  cells display fragmented and internalized spherical nucleoli upon Mlp1-GFP relocalization to the nucleolar periphery upon auxin treatment for 120 min. **C.** Structure and fragmentation of nucleolar domains (Gar1-tdTomato, red) in Wt, 1-6 hexanediol (10%, 15 min) treated,  $Enp1^{AID-HA}$  and  $Sgs1^{AID-HA}$  cells post-auxin treatment. Mlp1-GFP signal along nucleolar region indicated by white arrows. Histogram quantification of % cells with Mlp1-GFP signal along nucleolar periphery (n=100). **D.** Left: Analysis of nucleolar structure based on circularity (x axis) and solidity (color scale) of the nucleolar domains in each strain. The area of the nucleoli/nucleolar domains (ranging from 0.146 to 2.613 $\mu$ m<sup>2</sup>) is represented by circle size in the graph (n=100 nucleolar domains for each condition). Right: Bar graphs displaying the number of nucleolar domains in each condition or strain (n=100 cells for each). Scale bar =2 $\mu$ m.

A

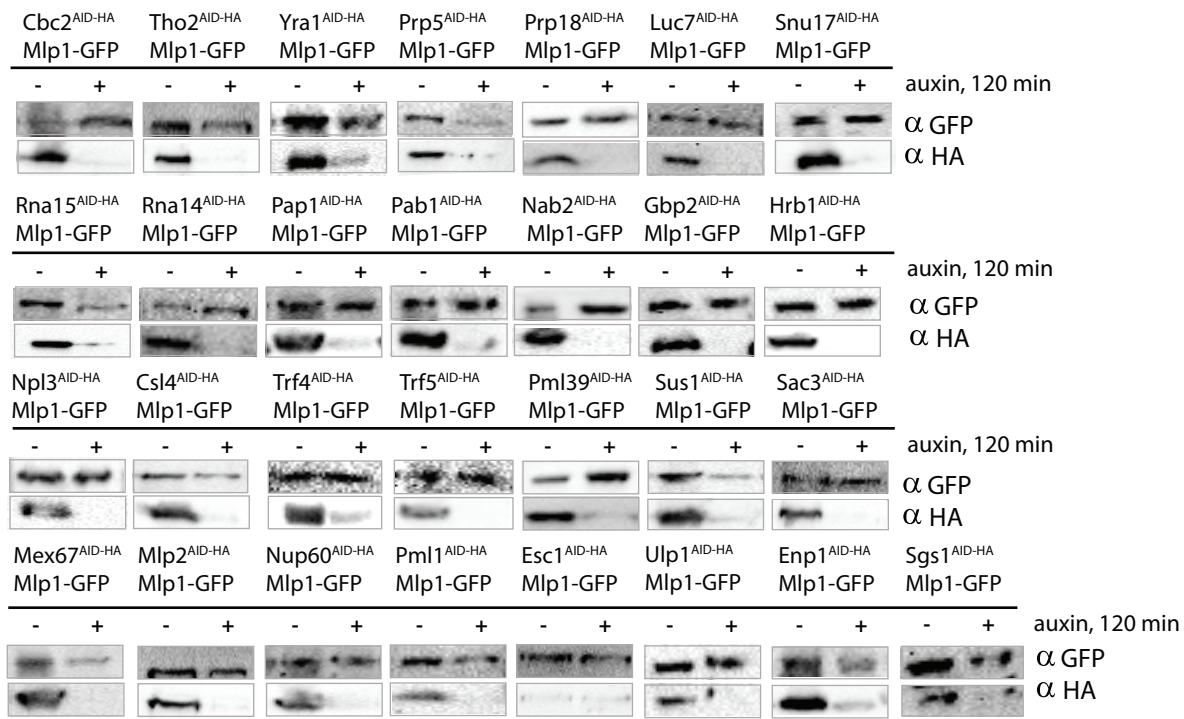

B

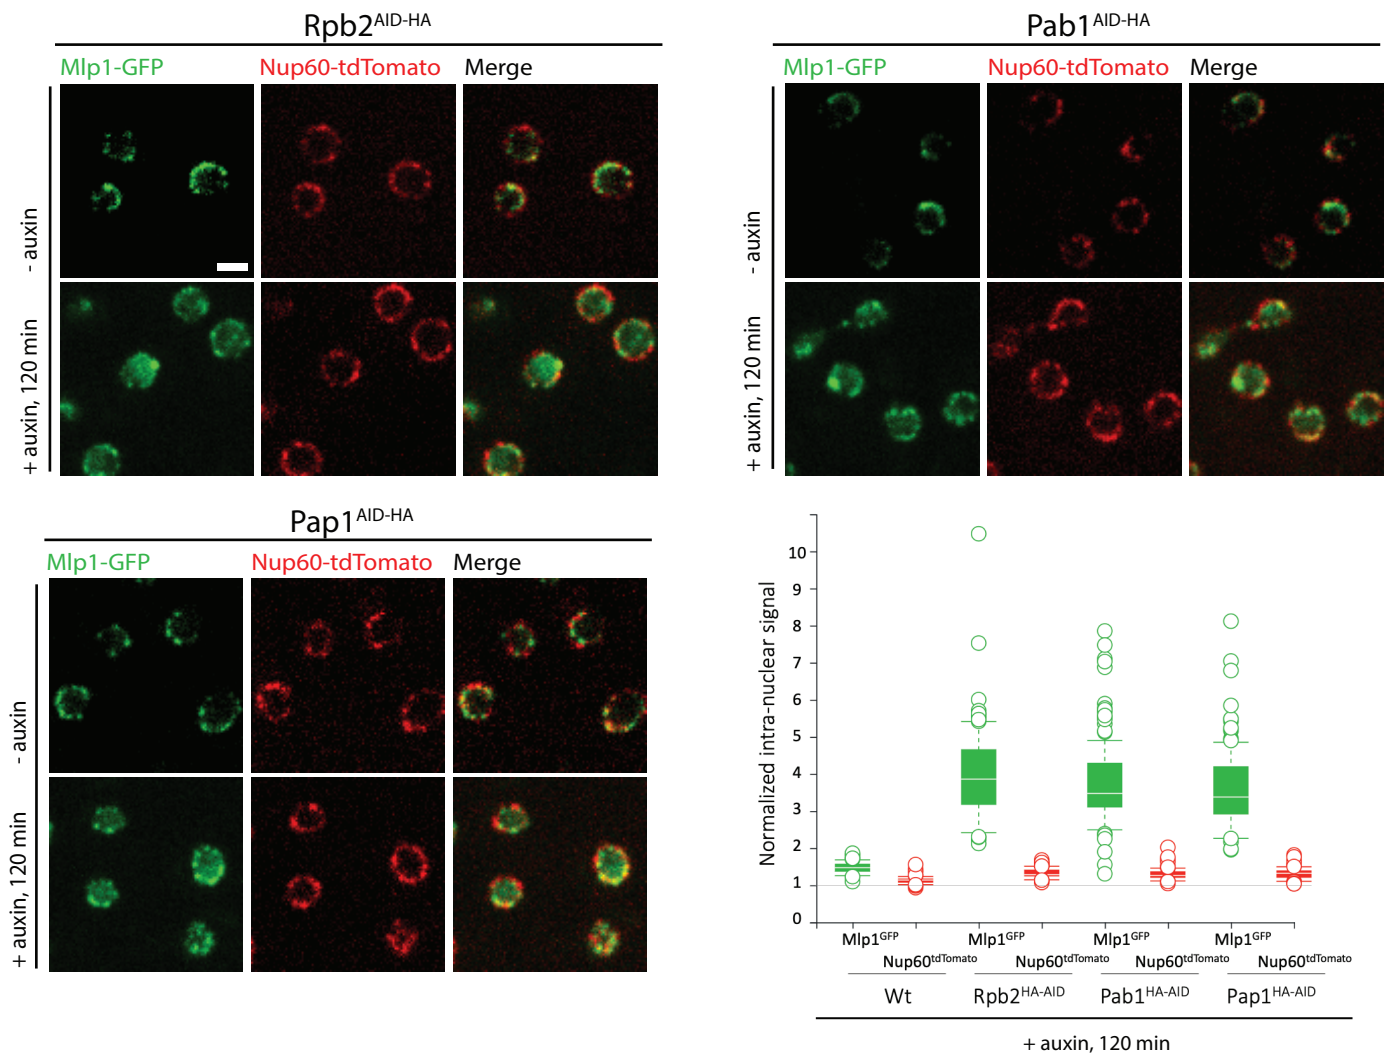



**Supplemental Figure S4. Expression and distribution of Mlp1-GFP upon depletion of select nuclear mRNA metabolism factors, Related to Figure 4.**

**A.** Western blot of total cell lysates from Mlp1-GFP/AID-HA-tagged strains pre- and 120 min post-auxin treatment. AID-HA tagged proteins and Mlp1-GFP were detected using anti-HA and anti-GFP antibodies, respectively. **B.** Mlp1-GFP distribution was monitored with respect to the nucleolus in cells where baskets were destabilized upon the addition of auxin and upon heat shock. Graphs represent the overlaps of Mlp1-GFP and Gar1-tdTomato signals (green and red curve respectively). White arrows show Mlp1-GFP signals remaining at the periphery, including in the nucleolar area after basket destabilization. Distribution of Mlp1-GFP and Nup60-tdTomato in Rpb2<sup>AID-HA</sup>, Pab1<sup>AID-HA</sup>, and Pap1<sup>AID-HA</sup> cells pre- and 120 min post-auxin treatment. Bar graph shows quantification of average Mlp1-GFP and Nup60-tdTomato intranuclear signal intensities in the center of cell nuclei normalized over background signals in all strains 120 min post-auxin treatment (n=100 cells for each strain; Data are represented as mean  $\pm$  SEM). Scale bar =2 $\mu$ m.

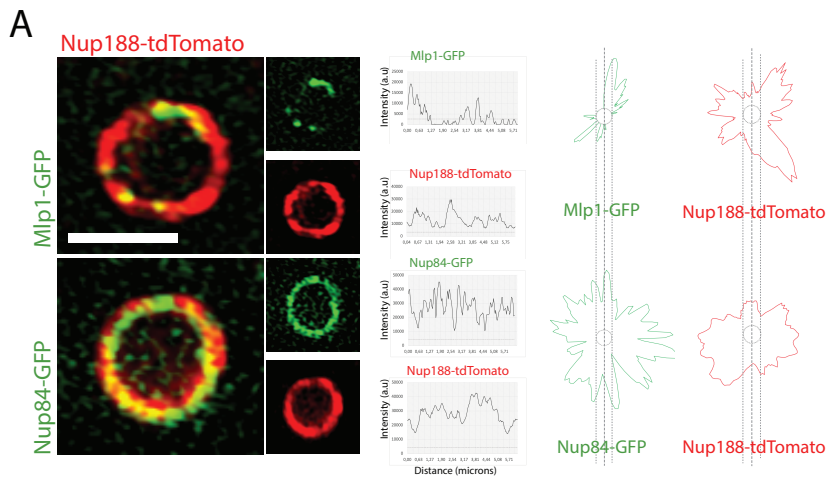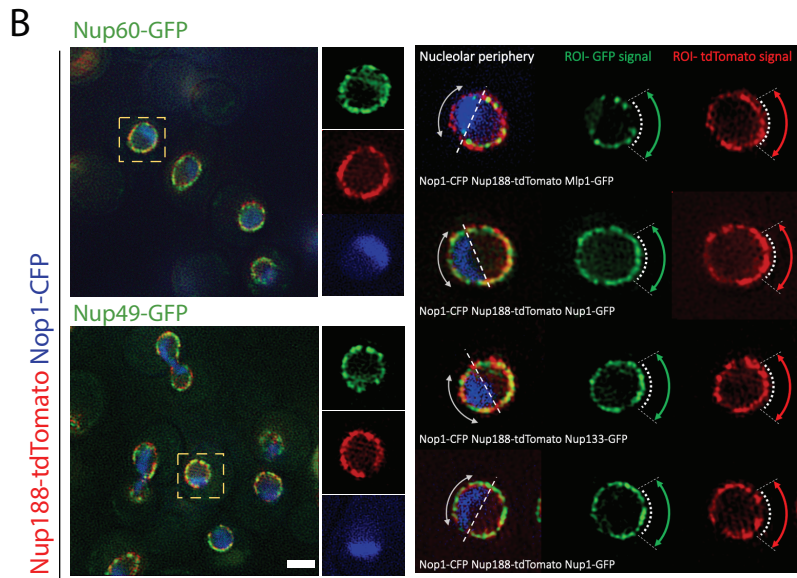

| GFP-tagged protein | NPC substructure         | Stoichiometry | Kim et al., 2018<br>Rajoo et al., 2018 |
|--------------------|--------------------------|---------------|----------------------------------------|
| Nup49              | Central FG nucleoporins  | 32            | Kim et al., 2018<br>Rajoo et al., 2018 |
| Nup133             | Outer ring nucleoporins  | 16            | Kim et al., 2018<br>Rajoo et al., 2018 |
| Nup42              | Cytoplasmic nucleoporins | 8             | Kim et al., 2018<br>Rajoo et al., 2018 |
| Nup60              | Basket nucleoporins      | 8-16*         | Kim et al., 2018<br>Rajoo et al., 2018 |
| Nup1               | Basket nucleoporins      | 8-16*         | Kim et al., 2018<br>Rajoo et al., 2018 |
| Nup2               | Basket nucleoporins      | N/D           | Kim et al., 2018<br>Rajoo et al., 2018 |
| Mlp1               | Basket scaffold          | 8*            | Kim et al., 2018<br>Rajoo et al., 2018 |

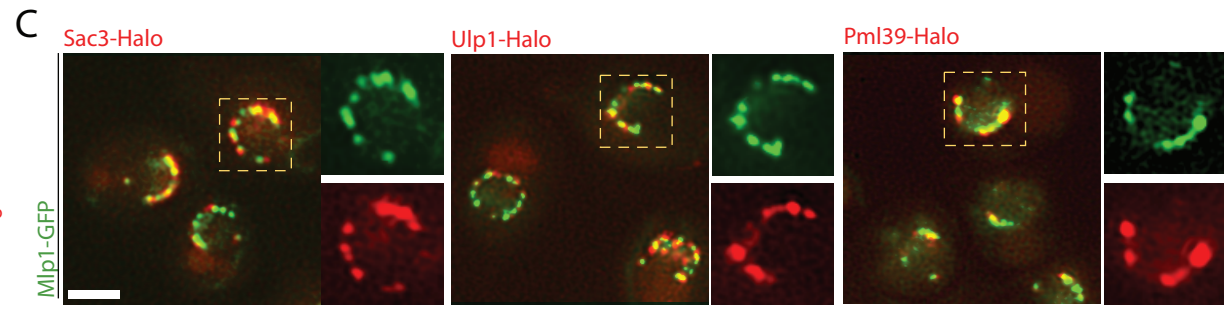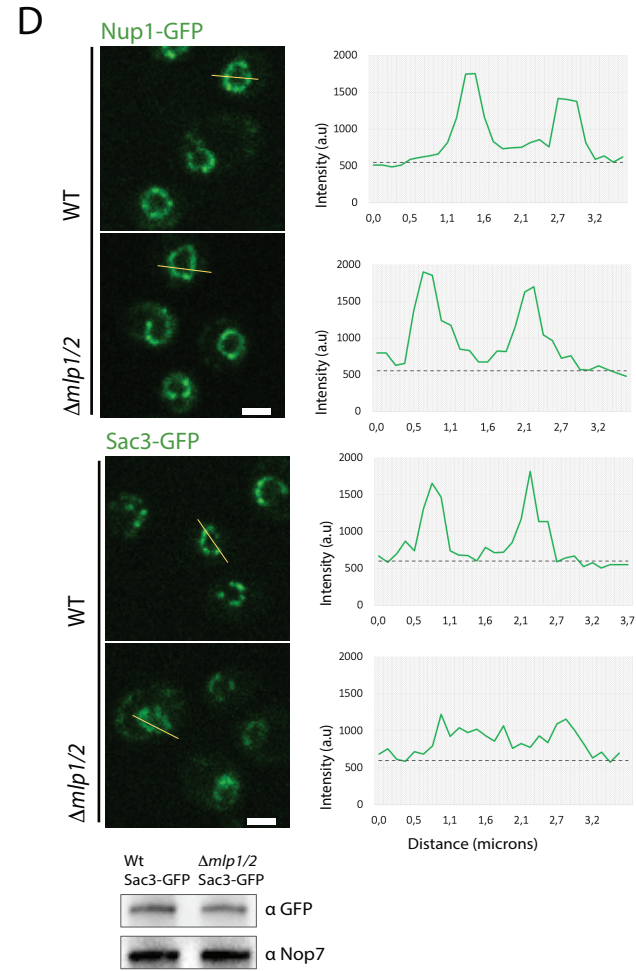

**Supplemental Figure S5. Localization of Mlp1, NPC and mRNP components by Structured illumination microscopy, Related to Figure 5.**

**A.** Structured illumination microscopy (SIM) of either Nup84-GFP or Mlp1-GFP (green) and Nup188-tdTomato (red); respective signal intensity distribution shown in line plots and circular diagrams where red dashes delimit nucleolar region; average background signal shown as grey circles and GFP distribution in green. **B.** SIM co-localization analysis of Nop1-CFP (, Nup188-tdTomato, and either Nup60-, Nup49-, or Nup2-GFP. Table indicates stoichiometries of selected Nups measured by either MS and/or different imaging approaches in yeast (\*numbers indicated represent an estimation and can vary depending on the study and on the approach chosen). **C.** SIM co-localization analysis of Mlp1-GFP and Sac3-, Ulp1-, and Pml39-Halo. **D.** Top: Distribution of Nup1- or Sac3-GFP in Wt and  $\Delta mlp1/2$  cells; line scan intensity plot shows GFP distribution in a single cell. Bottom: western blot of total cell lysates from Sac3-GFP/ Wt and  $\Delta mlp1/2$  cells. Nucleolar protein Nop7 was used as loading control and proteins detected using either anti-GFP and anti-Nop7 antibodies. Scale bar =2 $\mu$ m.

**A**

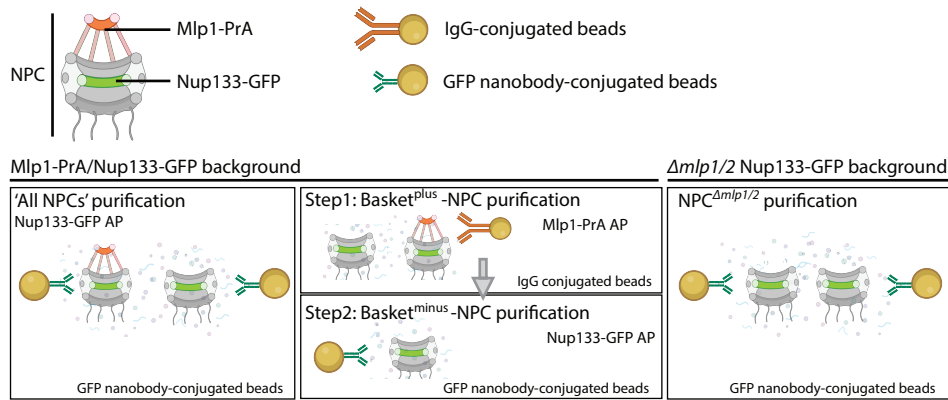

**B**

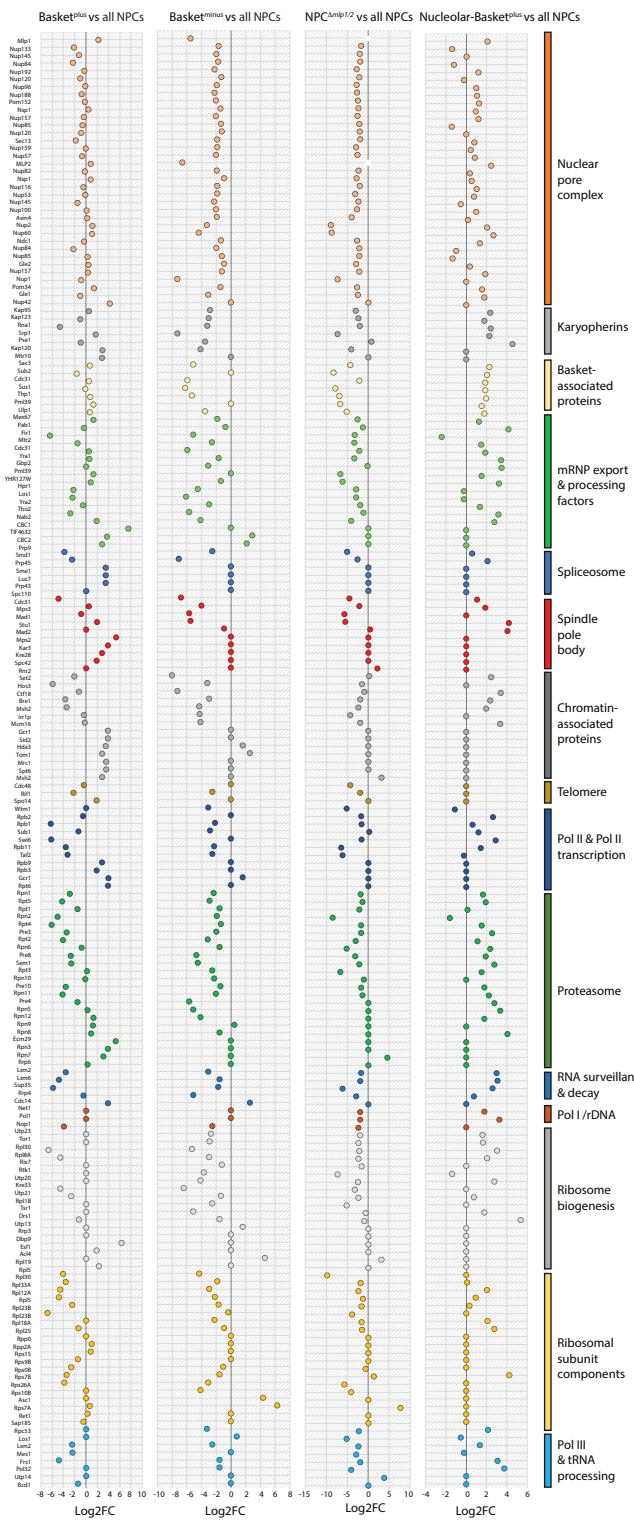

**C**

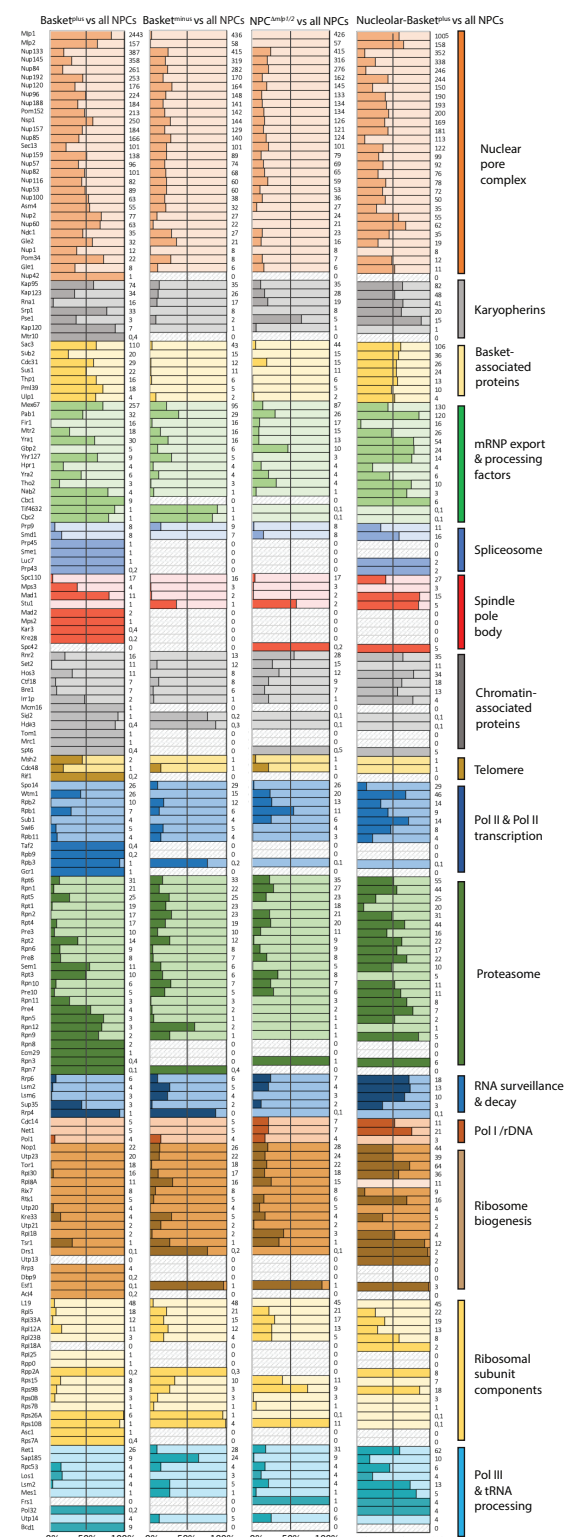

**Supplemental Figure S6. Method and data analysis for complexes co-isolated by differential affinity purification with basket-containing and basket-less NPCs, Related to Figure 6.**

**A.** Illustration of the NPCs affinity purifications. All NPCs were affinity purified via GFP-nanobodies-conjugated beads using yeast cell extracts from an Mlp1-PrA/Nup133-GFP double-tagged strain. Separation of basket-containing and basket-less NPCs was achieved from an Mlp1-PrA/Nup133-GFP double-tagged strain using a differential affinity purification approach, whereby Mlp1-PrA associated complexed (Basket<sup>plus</sup>) were isolated via IgG-conjugated beads, followed by the isolation of Nup133-GFP associated complexed (Basket<sup>minus</sup>) via GFP-nanobodies from the flow-through. Nup133-GFP associated complexed (Basket<sup>minus</sup>) were also isolated from  $\Delta$  *mlp1/2*/Nup133-GFP cells. n=3 for each condition. **B.** All NPCs, Mlp1-PrA (Basket<sup>plus</sup>), and Nup133-GFP (Basket<sup>minus</sup>) associated complexes were isolated from Mlp1-PrA/Nup133-GFP,  $\Delta$  *mlp1/2*/Nup133-GFP cells and Mlp1-PrA/Nup133-GFP/Enp1<sup>AID-HA</sup> cells 120 min post-auxin treatment. Proteins were included if identified as a high confidence interaction (i.e., at least five exclusive spectrum counts (ESC) in two biological replicates) and grouped according to their cellular functions. Each protein is presented as log<sub>2</sub>(FC) over proteins identified in ‘All NPCs’. **C.** Histograms showing normalized exclusive spectral counts of all proteins co-purified with the different pore APs relative to proteins identified in “All NPCs”. Bars represent percentage of peptide levels over ‘All NPCs’; only median ESC  $\geq$  10 were considered for quantitative analysis. Proteins were grouped according to their cellular functions.

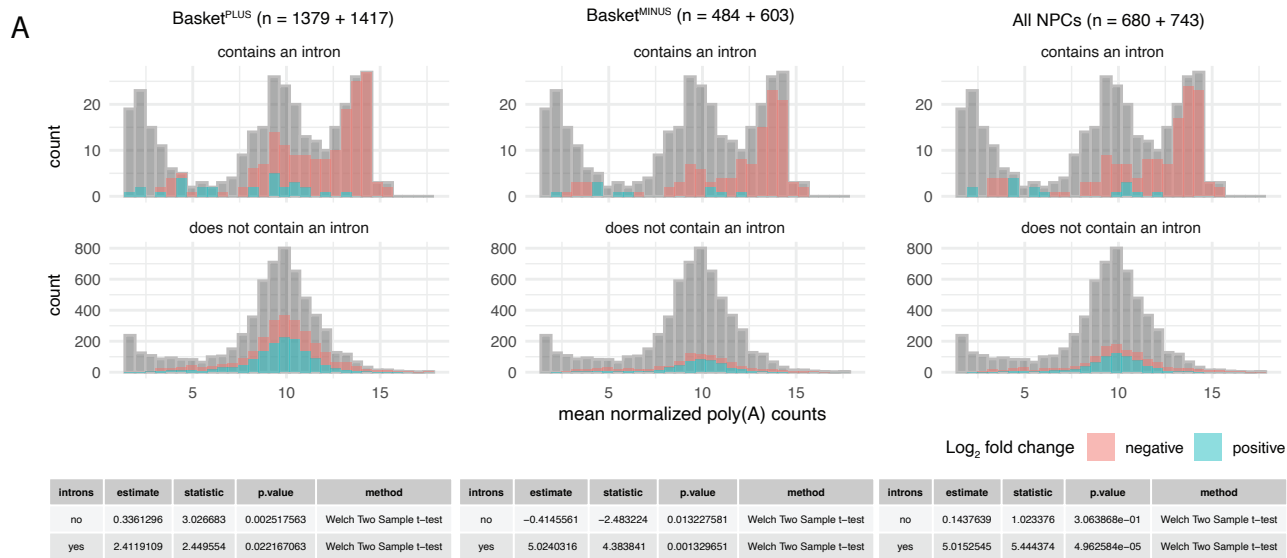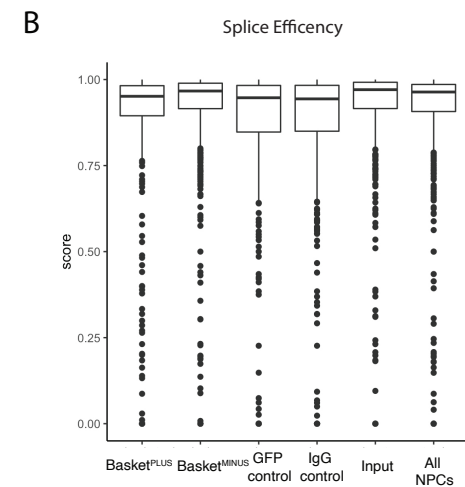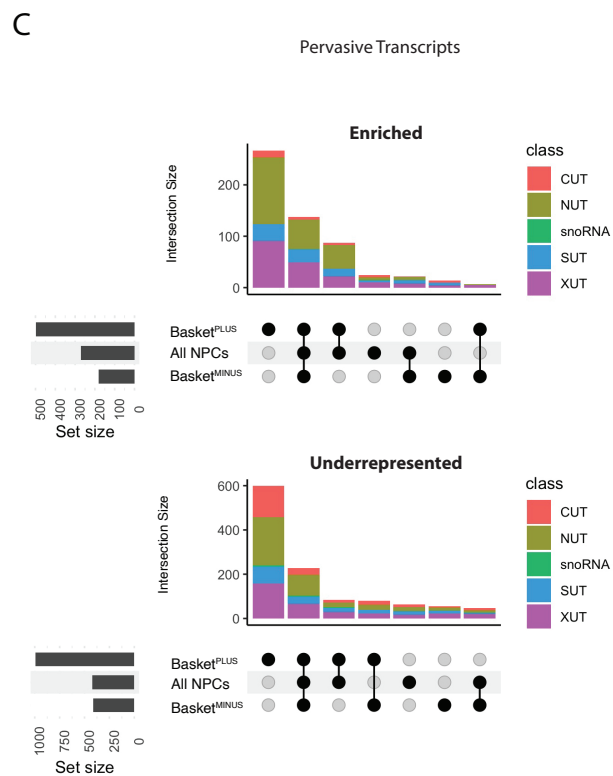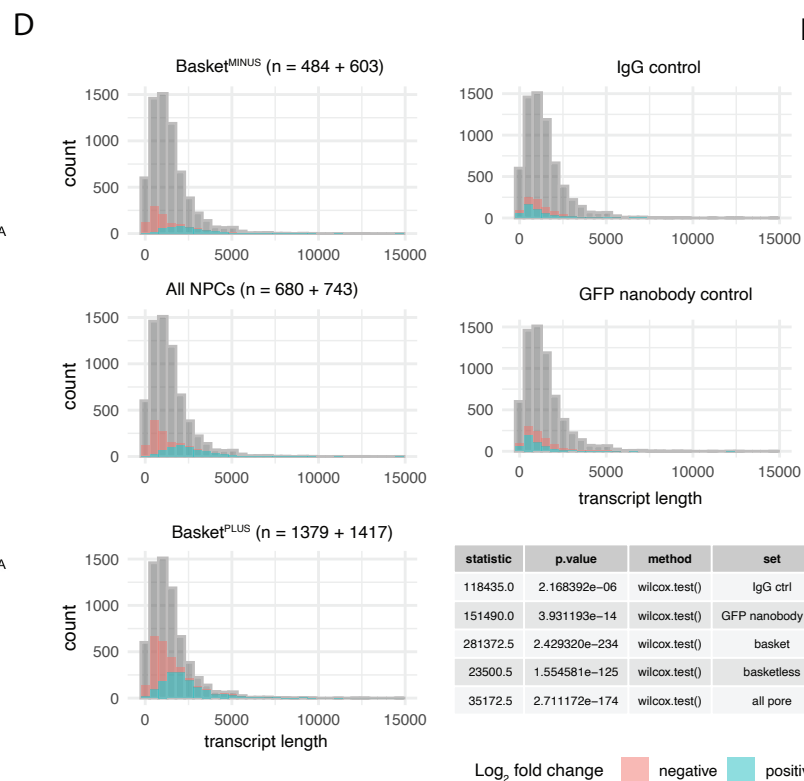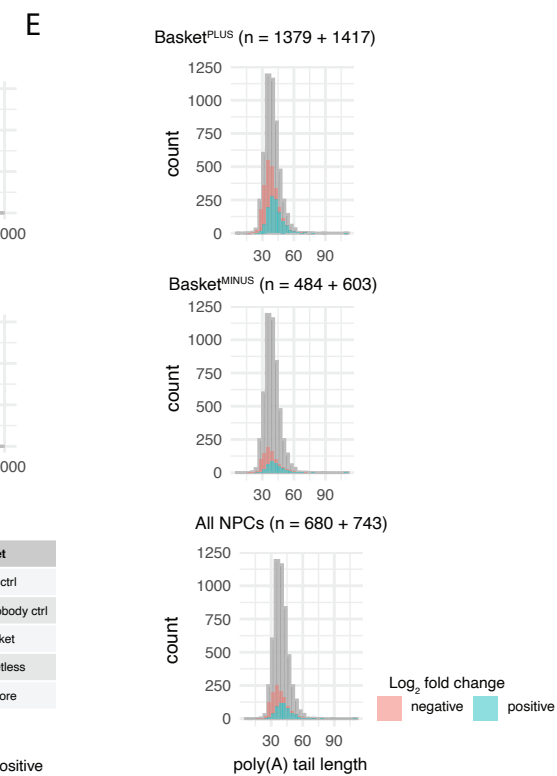

**Figure S7. Analysis of transcript features of co-isolated RNAs across affinity-purified basket-containing and basket-less NPC samples, Related to Figure 7.**

**A.** Histograms representing transcript enrichment in Basket<sup>plus</sup>, 'Basket<sup>minus</sup>' and 'All NPCs' from differential APs over mean transcript expression and intron content in the poly(A) library (grey).

**B.** Splicing efficiency for each intron in the *S. cerevisiae* genome was determined across samples using the SPLICE-q library. No significant differences were found for introns associated with basket-containing, basket-less, or all NPCs and the standard RNA-seq library (Input).

**C.** Upset plot. Top: Bar graph on the left represents the pervasive transcripts enriched with a  $\log_2(\text{FC}) < 1$  over poly(A) libraries across samples. Bar graph on top represents the pervasive transcripts exclusively enriched while dots in line with bars indicate shared transcript sets. Bottom: Bar graph on the left represents the pervasive transcripts underrepresented with a  $\log_2(\text{FC}) < 1$  over poly(A) libraries across samples. Bar graph on top represents the pervasive transcripts exclusively underrepresented, while dots in line with bars indicate shared transcript sets.

**D.** Histograms representing transcript enrichment in Basket<sup>plus</sup>, 'Basket<sup>minus</sup>' and 'All NPCs' from differential APs in relation to transcript length observed in poly(A) library (grey).

**E.** Histograms representing transcript enrichment in Basket<sup>plus</sup>, 'Basket<sup>minus</sup>' and 'All NPCs' from differential APs in relation to poly(A) tail length observed in poly(A) library (grey).

**Supplemental Table S2. Plasmids used in this study, Related to STAR Methods**

|                                                                                |                                |
|--------------------------------------------------------------------------------|--------------------------------|
| pZUT3 centromeric plasmid carrying GARI-GFP, URA3                              | Niepel et al. <sup>112</sup>   |
| centromeric plasmid pEXPGFPNLS_M2NT2 for Nterm2 Mlp1 fragment expression, HIS3 |                                |
| centromeric plasmid pUG34_GFP-NLS::HIS3                                        |                                |
| centromeric plasmid Nop-CFP His3                                               | A Kind gift of P.Chartrand lab |
| tdTomato tagging: pKAN tdtomato cyc loxP KAN loxP                              | PDZ264                         |
| GFP tagging: yeGFP, kITRP1                                                     | PDZ505                         |
| GFP tagging: yeGFP, pHyg                                                       | PDZ504                         |
| Halo tagging: pSJW01 Halo, pHyg                                                | PDZ823, kind gift of Reyes lab |
| Auxin inducible degron tagging: AID-6HA, pHyg                                  | Morawska et al, 2013           |
| ProteinA tagging: PrA, pHyg                                                    | PDZ659                         |



### Supplemental Table S3. Primers used in this study, Related to STAR Methods

| C-terminal tagging (5'-3') | Sequence                                                                       |
|----------------------------|--------------------------------------------------------------------------------|
| Mlp1-GFP (Fwd)             | AAGATGAGGAAGAAAAAGAAACCGATAAAGGTGAATGACGAGAACAGTATACGTACGCTGCAGGTCGAC          |
| Mlp1-GFP (Rev)             | ACATTGAAAAGGTTTAGTTGTATTGATCCCTGTGTTTTACTATCTCCTATCGATGAATTCGAGCTCG            |
| Gar1-tdTomato (Fwd)        | GGATCTCGTGGCGGATCTCGTGGTGGTTTCAGAGGAGGTAGAAGAGCTCTAGAAGTAGTGGATCC              |
| Gar1-tdTomato (Rev)        | CAGATATAGTAAAGTTGGAAGAAATGAAGAATTGTGAAAGATAAAGGGCATAGGCCACTAGTGGATCTG          |
| Nup188-tdTomato (Fwd)      | CAAGGGTATCAGCAGAGACATTAAGCATTACAAGATTCATATTAAAGGACGTTGCTCTAGAAGTAGTGGATCC      |
| Nup188-tdTomato (Rev)      | GCACCTGCACCTGTCATTATTATATTATGTAGCTTTACATAACCTGCAAAAATAAGGCATAGGCCACTAGTGGATCTG |
| Mlp1-Halo (Fwd)            | GAGGAAGAAAAAGAAACCGATAAAGGTGAATGACGAGAACAGTATAGGTGACGGTGTGGTTTA                |
| Mlp1-Halo (Rev)            | GCAGAAATGAAGCTCCTCCACATTGAAAAAGGTTTAGTTTGTATTGACACAGGAAACAGCTATGACC            |
| Nup188-Halo (Fwd)          | CAAGGGTATCAGCAGAGACATTAAGCATTACAAGATTCATATTAAAGGACGTTGGTACGGTGTGGTTTA          |
| Nup188-Halo (Rev)          | GCACCTGCACCTGTCATTATTATATTATGTAGCTTTACATAACCTGCAAAAATAAGACACAGGAAACAGCTATGACC  |
| Rpa135-AID-HA (Fwd)        | CTATCCGCAATGGGTATAAGATTGCGTTATAATGTAGAGCCAAACGTACGCTGCAGGTCGAC                 |
| Rpa135-AID-HA (Rev)        | CCTTCATTTACCATTCTATATCAATTTGGAAAGAAGGGTATTCTATCGATGAATTCGAGCTCG                |
| Rpb2-AID-HA (Fwd)          | ATGAACATTACACCAGCTTTATATACCGATCGTTCGAGAGATTTTCGTACGCTGCAGGTCGAC                |
| Rpb2-AID-HA (Rev)          | AATGTTTTTATTATTTTACTTTCTTAGAGTTACAACATTATTTCATCGATGAATTCGAGCTCG                |
| Enp1-AID-HA (Fwd)          | CAGGGAGTTGTGTATCCACAGGAAGCTAATGATGATTTAATGATTGATGTCAATCGTACGCTGCAGGTCGAC       |
| Enp1-AID-HA (Rev)          | TGAAAGGGGAAAGACCGAGCGATATAAAATTGATGAAAAATTGATATTACAGCAATCGATGAATTCGAGCTCG      |
| Csl4-AID-HA (Fwd)          | GATGACTCACCGGTTACAGGCGCTACAGAAAGCGCAAAATGTGCCAAACCTTTTCGTACGCTGCAGGTCGAC       |
| Csl4-AID-HA (Rev)          | TACCCTCTTTAAATATATACGCGTCTATATGCACCTGTAGATAAGCTGTTACATAATCGATGAATTCGAGCTCG     |
| Rna14-AID-HA (Fwd)         | GAATTTTTAAATGATCAAGTAGAGATTCCAACAGTTGAGAGCACCAAGTCAGGTCGTACGCTGCAGGTCGAC       |
| Rna14-AID-HA (Rev)         | TTATAATAGATGTGTGGTATAAATATTCATATATACCTATTTAATTAACGTAATGATCGATGAATTCGAGCTCG     |
| Rna15-AID-HA (Fwd)         | GATGGCTATTTGGGACTTAAACAAAAAGCATTAAAGGGGAGAATTTGGTGCATTTTCGTACGCTGCAGGTCGAC     |
| Rna15-AID-HA (Rev)         | GTTGCCTCATATTGCGGAACCGCAITTTTTTTTTGTATTTTGCTCCTAGTTATCGATGAATTCGAGCTCG         |
| Nup60-AID-HA (Fwd)         | AAATGGCTTGGTGTATGAAAATAAAGTTGAGGCTTCAAGTCCCTATATACCTTCGTACGCTGCAGGTCGAC        |
| Nup60-AID-HA (Rev)         | CTTACGTATTGAGTTGGGCTATACGGTAATTATGTCACGGCTAAAATTTTCATTAATCGATGAATTCGAGCTCG     |
| Esc1-AID-HA (Fwd)          | TAGGGGACAGGACCAAAAAAGCCGTGGACAGAATACGCATCCAAGTGTGACAAACGTACGCTGCAGGTCGAC       |
| Esc1-AID-HA (Rev)          | AGAAAAACGCATCGCAATAATTACTATCTACATATTCCTGTATACAATTTGAATCGATGAATTCGAGCTCG        |
| Ulp1-AID-HA (Fwd)          | TGCGATTAGGATGAGAAGATTTATTGCCATTTGATTTAAACCGACGCTTTAAACGTACGCTGCAGGTCGAC        |
| Ulp1-AID-HA (Rev)          | CAATGATCTGAATATTTCTACTTATGTATAATAATTGTATATTATAAAGAATAAATCGATGAATTCGAGCTCG      |
| Mlp2-AID-HA (Fwd)          | ACACCAAAAAGGTTAAAGAGAGTCCAGCAAAATGATCAAGCTTCCAACGAGCGTACGCTGCAGGTCGAC          |
| Mlp2-AID-HA (Rev)          | AAAATATGTAGATGTTTCATATTTATATAATTACATTGTTAATATTACAATCGATGAATTCGAGCTCG           |
| Yra1-AID-HA (Fwd)          | TAAGAAAAGTCTTGAAGATCTGGACAAGGAAATGGCGGACTATTCGAAAAGAAACGTACGCTGCAGGTCGAC       |
| Yra1-AID-HA (Rev)          | GGaaaaataaatttaataaaaccaaataatcaacaaaaaaTTGACAATTAATCGATGAATTCGAGCTCG          |
| Tho2-AID-HA (Fwd)          | TCAGGCGCTTCGCAAGGTCCCAAGGTGGGAATTACGTAGTAGGTACCAGAGGCGTACGCTGCAGGTCGAC         |
| Tho2-AID-HA (Rev)          | GGGAACTATCAAAGTACACGTTAAAATTCAGCTCGGGTATGTTAAGTACTAGTAAATCGATGAATTCGAGCTCG     |
| Sac3-AID-HA (Fwd)          | TATATTAGAGCTGAAGATCTGTATCGATTCTGTCAAGAAGAAAGTAAATAATGATCGTACGCTGCAGGTCGAC      |
| Sac3-AID-HA (Rev)          | TTCTAAAGCTATAGAAAAATGCACATTTCTTTGTTTATATATTACAAATGCTATCGATGAATTCGAGCTCG        |
| Sus1-AID-HA (Fwd)          | GTTTTAAAGCAAATAAGGGAATTTCTTGAAGAGATTGTAGATACACAACGTACGCTGCAGGTCGAC             |
| Sus1-AID-HA (Rev)          | TTTCCCGATGAGCATATGTAATAATATTGGGAATTAAGGTGCATTTTCGTATCCTATCGATGAATTCGAGCTCG     |
| Nab2-AID-HA (Fwd)          | AAATGCTCTCCGCAAAACAGTTTACGCACCAAGAACAAGATACGGAAATGAACCGTACGCTGCAGGTCGAC        |
| Nab2-AID-HA (Rev)          | CTTCCATCAAAAAGGTCACAGGAACATGAATTTCCGTTCCGTGATTTAATAGTAAATCGATGAATTCGAGCTCG     |
| Pab1-AID-HA (Fwd)          | TTCTGCTGCCTATGAGTCTTTCAAAAAGGAGCAAGAACAACAACTGAGCAAGCTCGTACGCTGCAGGTCGAC       |
| Pab1-AID-HA (Rev)          | AGAAAAAAAAGATGATAAGTTGTTGAGTAGGGAAGTAGGTGATTACATAGAGCAATCGATGAATTCGAGCTCG      |

|                    |                                                                            |
|--------------------|----------------------------------------------------------------------------|
| Pap1-AID-HA (Fwd)  | AGATGCTGCTTCAGGTGACAACATCAATGGCACAACCCGACGCTGTTGACGTAAACCGTACGCTGCAGGTCGAC |
| Pap1-AID-HA (Rev)  | GTTTATGACTGATTAACCTATATTAATAAACTATTCAACTATAAATAGGAATGTCATCGATGAATTCGAGCTCG |
| Pml39-AID-HA (Fwd) | GAAATTGGGCGTGGGAGAAAGACTAAATAAATTAGAGGCTGTTCTACAACTTTACGTACGCTGCAGGTCGAC   |
| Pml39-AID-HA (Rev) | CAGCATGGGGGCATATACAAGCATATGAGAATTGGATAATGTATTACATCTAATATCGATGAATTCGAGCTCG  |
| Pml1-AID-HA (Fwd)  | TACACTTTCAGAATTTGAAGAAGATACCGATTACGAACCTCATCTTCATGAATGTACGTACGCTGCAGGTCGAC |
| Pml1-AID-HA (Rev)  | CAGCATTCAAAGAAGAATAATTAACACACTGAAAGTGTGTTTCTTATATATGGATCGATGAATTCGAGCTCG   |
| Prp5-AID-HA (Fwd)  | GGGGTCGTAAGGCTGCAAGCTGTCTTTGAAGAGTACTAAATACCGTACGCTGCAGGTCGAC              |
| Prp5-AID-HA (Rev)  | AACTACGAAAGTATATAGCACCAGGAGTGAGTTAAATCTAAAAATCGATGAATTCGAGCTCG             |
| Snu17-AID-HA (Fwd) | ATAGCTGATAGACTGTGGAGTCGTAAAGAAATTCGCTTGGGGACCCGTACGCTGCAGGTCGAC            |
| Snu17-AID-HA (Rev) | GAGCGAGCCTTTCCCTTTTGGGACGCGCGCAAGGCCCTTCTGTTATCGATGAATTCGAGCTCG            |
| Luc7-AID-HA (Fwd)  | AACGCCAGCAAGACAGTACTACTACCCGGAAGACGCTTTGTGCTACGCTGCAGGTCGAC                |
| Luc7-AID-HA (Rev)  | TCCTTCGAACAAAATTTTCTAGCATCATTTTTTATGTATGGCCATCGATGAATTCGAGCTCG             |
| Mex67-AID-HA (Fwd) | AAAGGGTTTTTCAGAGTAGCATGAATGGCATCCCTAGAGAAGCATTGTGCAGTCCGTACGCTGCAGGTCGAC   |
| Mex67-AID-HA (Rev) | GCTTAAACTGTATATTTTTGTGATACTGTGCGGCTGAAACAGGGAACAATATCAATCGATGAATTCGAGCTCG  |
| Hrb1-AID-HA (Fwd)  | GAATAATTATAACTATGGGGGTTGTGATTTGGATATATCGTACGCTAAACGCCTCCGTACGCTGCAGGTCGAC  |
| Hrb1-AID-HA (Rev)  | ATAAATACTTGTGCGAGATCCAATAGGTGAGAAAGTATATAGATCGAGAGTAGTTATCGATGAATTCGAGCTCG |
| Cbc2-AID-HA (Fwd)  | TACTTTCAGACCAGGTTTCGATGAAGAAAGAGAAGATGATAACTACGTACCTCAGCGTACGCTGCAGGTCGAC  |
| Cbc2-AID-HA (Rev)  | ATATATATATATATCTGTGTGATAAATCTTCTCAGATATAAATTGATTGATTATCGATGAATTCGAGCTCG    |
| Gbp2-AID-HA (Fwd)  | AAATAATTATAATTATGGTGGTTGTAGTTTACAGATCTCTTATGCTAGACGTGATCGTACGCTGCAGGTCGAC  |
| Gbp2-AID-HA (Rev)  | TTATTTATACGTTATCATAAAGTACACAGGTCATGGTTCGGTGGTGCTTAGGAAATCGATGAATTCGAGCTCG  |
| Npl3-AID-HA (Fwd)  | TCCAAGAGATGCATACAGAACCAGAGATGCTCCACGTGAAAGATCACCACAGGCGTACGCTGCAGGTCGAC    |
| Npl3-AID-HA (Rev)  | ACAATTCATATCTTTGTAAATTTCTCCTTTTTTTTCTCAACTATATAAATGGCATCGATGAATTCGAGCTCG   |
| Prp18-AID-HA (Fwd) | TAAAAGATTAATAACTTTTGAAGAATGGTATACCAGCAACCAGATAGCTTAGCCGTACGCTGCAGGTCGAC    |
| Prp18-AID-HA (Rev) | TTATTTGGCCGCATGATATCGTGCCACGCGATAACGAAAACAATAGTTCAACAAATCGATGAATTCGAGCTCG  |
| Nup84-GFP (Fwd)    | TGGAAGGTTAAAGAGTATCTGGATCTCGTTGCTCGCACAGCAACCCCTTCGAACCGTACGCTGCAGGTCGAC   |
| Nup84-GFP (Rev)    | TAAAATTATTGCTGTTACTTAAAATATAAACTTATTCTGCAATACATTAATTGAATCGATGAATTCGAGCTCG  |
| Nup60-GFP (Fwd)    | AAATGGCTTGGTTGATGAAATAAAGTTGAGGCTTCAAGTCCCTATATACCTTTCGTACGCTGCAGGTCGAC    |
| Nup60-GFP (Rev)    | CTTACGTATTGAGTTGGGCTATACGGTAATTATGTCACGGCTAAAATTTTCATTAATCGATGAATTCGAGCTCG |
| Nup49-GFP (Fwd)    | GCCGTGTTACATCAAAAAACGAAAACACTGGCATCATTGAGCATAGCTCTAGAACTAGTGGATCC          |
| Nup49-GFP (Rev)    | TGTACAAGACATTTGTACTTGTATACGCACTATATAAACTTTCAGCATAGGCCACTAGTGGATCTG         |
| Nup133-GFP (Fwd)   | TGTAGCGAAAGAAAAAACTATACCATCAACTATGAAACCAACACTGTAGAATACCGTACGCTGCAGGTCGAC   |
| Nup133-GFP (Rev)   | TATTATCATTCCCAGTAAAGTTTATTATATATATGTAATAATGTTATTATAGATAATCGATGAATTCGAGCTCG |
| Ulp1-GFP (Fwd)     | TGCGATTAGGATGAGAAGATTTATTGCCATTTGATTTTAACCGACGCTTTAAAACGTACGCTGCAGGTCGAC   |
| Ulp1-GFP (Rev)     | CAATGATCTGAATATTTCTACTTATGTATAATAATGTATATTATAAAGAATAAATCGATGAATTCGAGCTCG   |
| Pml39-GFP (Fwd)    | AGGAGAAATAAAACATTATTCCCAGGAATTGAGAGGAAAGTAGGGCAGTTACTACGTACGCTGCAGGTCGAC   |
| Pml39-GFP (Rev)    | CAGCATGGGGGCATATACAAGCATATGAGAATTGGATAATGTATTACATCTAATATCGATGAATTCGAGCTCG  |
| Mex67-GFP (Fwd)    | AAAGGGTTTTTCAGAGTAGCATGAATGGCATCCCTAGAGAAGCATTGTGCAGTCCGTACGCTGCAGGTCGAC   |
| Mex67-GFP (Rev)    | GCTTAAACTGTATATTTTTGTGATACTGTGCGGCTGAAACAGGGAACAATATCAATCGATGAATTCGAGCTCG  |
| Sac3-GFP (Fwd)     | TATATTAGAGCTGAAGATCTTGATCGATTCTGTCAAGAAGAAAGTAAATAATGATCGTACGCTGCAGGTCGAC  |
| Sac3-GFP (Rev)     | TTCTAAAAGCTATAGAAAAAATGCACATTTCTTTTGTATATATTACAAATGCTATCGATGAATTCGAGCTCG   |
| Mlp2-GFP (Fwd)     | ACACCAAAAAGGTTAAAGAGAGTCCAGCAAATGATCAAGCTTCCAACGACGCTACGCTGCAGGTCGAC       |
| Mlp2-GFP (Rev)     | AAAATATGTAGATGTTTCATATTTATATAATTACATTGTTTAAATATTACAATCGATGAATTCGAGCTCG     |
| Ulp1-Halo (Fwd)    | TGCGATTAGGATGAGAAGATTTATTGCCATTTGATTTTAACCGACGCTTTAAAAGGTGACGGTGCTGGTTTA   |
| Ulp1-Halo (Rev)    | CAATGATCTGAATATTTCTACTTATGTATAATAATGTATATTATAAAGAATAAACACAGGAAACAGCTATGACC |
| Pml39-Halo (Fwd)   | GAAATTGGGCGTGGGAGAAAGACTAAATAAATTAGAGGCTGTTCTACAACTTTAGGTGACGGTGCTGGTTTA   |

|                      |                                                                               |
|----------------------|-------------------------------------------------------------------------------|
| Pml39 Halo (Rev)     | CAGCATGGGGGCATATACAAGCATATGAGAATTTGGATAATGTATTACATCTAATACACAGGAAACAGCTATGACC  |
| Sac3-Halo (Fwd)      | TATATTAGAGCTGAAGATCTTGATCGATTCTGTCAAGAAGAAAGTAAATAATGATGGTGACGGTGTGGTTTA      |
| Sac3-Halo (Rev)      | TTCTAAAGCTATAGAAAAATGCACATTTCTTTTGTATATATTACAAATGCTACACAGGAAACAGCTATGACC      |
| Nab2-tdTomato (Fwd)  | AAATGCTCCTCCGCAAACCAGTTTTACGCACCAAGAACAAGATACGGAAATGAACGCTCTAGAAGCTAGTGGATCC  |
| Nab2-tdTomato (Rev)  | TTGAATAGGTGCTTCCATCAAAAGGGTCACAGGAACATGAATTTGTTCCGTGAGCATAGGCCACTAGTGGATCTG   |
| Sac3-tdTomato (Fwd)  | TATATTAGAGCTGAAGATCTTGATCGATTCTGTCAAGAAGAAAGTAAATAATGATGCTCTAGAAGCTAGTGGATCC  |
| Sac3-tdTomato (Rev)  | TTCTAAAGCTATAGAAAAATGCACATTTCTTTTGTATATATTACAAATGCTGCATAGGCCACTAGTGGATCTG     |
| Pml39-tdTomato (Fwd) | GAAATTGGGCGTGGGAGAAAGACTAAATAAATTAGAGGCTGTTCTACAACTTTAGCTCTAGAAGCTAGTGGATCC   |
| Pml39-tdTomato (Rev) | CAGCATGGGGGCATATACAAGCATATGAGAATTTGGATAATGTATTACATCTAATGCATAGGCCACTAGTGGATCTG |
| Ulp1-tdTomato (Fwd)  | TGCGATTAGGATGAGAAGATTTATTGCCATTTGATTTAAACCGACGCTTTAAAAGCTCTAGAAGCTAGTGGATCC   |
| Ulp1-tdTomato (Rev)  | CAATGATCTGAATATTTCTACTTATGTATAATAATGTATATTATAAAGAATAAGCATAGGCCACTAGTGGATCTG   |
| Mlp1-PrA (Fwd)       | GACTGAAGATGAGGAAGAAAAAGAAACCGATAAGTGAATGACGAGAACAGTATAGGTGAAGCTCAAAAACCTAAT   |
| Mlp1-PrA (Rev)       | CCTCCACATTGAAAAAGGTTTAGTTTGTATTGATCCCTGTTTTACTATCTCTATCGATGAATTCGAGCTCG       |
| Nup60-tdTomato (Fwd) | AAATGGCTTGGTTGATGAAAATAAAGTTGAGGCTTCAAGTCCCTATATACCTTTGCTCTAGAAGCTAGTGGATCC   |
| Nup60-tdTomato (Rev) | CTTACGTATTGAGTTGGGCTATACGGTAATTATGTCACGGCTAAAATTTTCATTAGCATAGGCCACTAGTGGATCTG |
| Nup2-GFP (Fwd)       | CGCTCATTACGAAAGCTATTGAAGATGCTAAAAAAGAAATGAAACGTACGCTGCAGGTCGAC                |
| Nup2-GFP (Rev)       | ATATGAGGGTCTATTCTATTTAAAATTGTTAACTGTATTACTC ATCGATGAATTCGAGCTCG               |
| Nup42-GFP (Fwd)      | CATCAAGCTATCATTAAATTTCCGACCCGACGACCACTCAACTGTACGGATCCCCGGGTTAATTA             |
| Nup42-GFP (Rev)      | TAATGCATTTTTCATTAGATATATATATATATTCATATATATTGTGAATTCGAGCTCGTTAAAC              |
| Nup1-GFP (Fwd)       | GGGCGGTGGTGTATGGCGAACAGAAAGATTGCAAGAATGAGGCACTCTAAAAGGCGTACGCTGCAGGTCGAC      |
| Nup1-GFP (Rev)       | TAGGAATATATATCCCTTCAGAAAAGCAACACAATACCTAATTACATAACCGATATATCGATGAATTCGAGCTCG   |
| Nup49-GFP (Fwd)      | GAATCGCGGTGTACATCAAAAAACGAAACACTGGCATATTGAGCATACTGACGCTGCAGGTCGAC             |
| Nup49-GFP (Rev)      | GACATTTGACTTGTATACGCACATATAAACTTTACAGGCGATTTACATCGATGAATTCGAGCTCG             |
| Trf4-AID-HA (Fwd)    | TCTAGCGAAGATGATGATGAAGATGGATATAATCCTTATACCTTCGTACGCTGCAGGTCGAC                |
| Trf4-AID-HA (Rev)    | CAGTGTGTACAGTTCAGTGCATCAITTAACAAAAAGGCACATAATCGATGAATTCGAGCTCG                |
| Trf5-AID-HA (Fwd)    | GCTCAAACGAGAAGGGACTACTGGCTCTCTAAAGGCCAGGCTCTTCGTACGCTGCAGGTCGAC               |
| Trf5-AID-HA (Rev)    | TATTCITGTATAAATAGTAAATAGTCTATAAGAGTCTATATTGTGATCGATGAATTCGAGCTCG              |
| Sgs1-AID-HA (Fwd)    | AGGTTTTAGAAATTACCGAGGCTACTACAGAGGAAGAAAGCGTACGCTGCAGGTCGAC                    |
| Sgs1-AID-HA (Rev)    | ATCGATGAATTCGAGCTCGGAATGGTGTCTAGTTATAAGTAACTATTTATTTTCTACTCT                  |
